# Supplementary material
Source: PubMed Central journal article supplement (PMC6484391)
Supplement: blood887067-suppl1.pdf [file blood887067-suppl1.pdf]

## SUPPLEMENTAL TABLES

**Table S1. Cy/Flu lymphodepletion regimens**

| <b>Lymphodepletion regimen</b>                              | <b>Number of patients (%)</b> |
|-------------------------------------------------------------|-------------------------------|
| High-intensity lymphodepletion                              | 31 (65)                       |
| Cy 60 mg/kg x 1 + Flu 25 mg/m <sup>2</sup> x 3              | 30 (63)                       |
| Cy 60 mg/kg x 1 + Flu 25 mg/m <sup>2</sup> x 5              | 1 (2)                         |
| Low-intensity lymphodepletion                               | 17 (35)                       |
| Cy 30 mg/kg x 1 + Flu 25 mg/m <sup>2</sup> x 3              | 6 (13)                        |
| Cy 300 mg/m <sup>2</sup> x 3 + Flu 30 mg/m <sup>2</sup> x 3 | 10 (21)                       |
| Cy 500 mg/m <sup>2</sup> x 3 + Flu 30 mg/m <sup>2</sup> x 3 | 1 (2)                         |
| <b>Total</b>                                                | <b>48 (100)</b>               |

Cy, cyclophosphamide; Flu, fludarabine

**Table S2. List of factors considered in multivariable analyses**

| Variable                                                | Variable                                                    |
|---------------------------------------------------------|-------------------------------------------------------------|
| <b>Pre-treatment</b>                                    | <b>Lymphodepletion</b>                                      |
| Abnormal B cells in blood (cells/ $\mu$ L)              | Low-intensity Cy/Flu†                                       |
| Abnormal B cells in blood (%)                           | <b>Biomarkers</b>                                           |
| Abnormal B cells in marrow (%)                          | IFN- $\gamma$ #                                             |
| Absolute lymphocyte count (cells/ $\mu$ L)*             | IL-2 receptor $\alpha$ #                                    |
| Absolute neutrophil count (cells/ $\mu$ L)*             | IL-5#                                                       |
| Age                                                     | IL-6#                                                       |
| Ann Arbor stage                                         | IL-7#                                                       |
| Anti-CD19 targeted therapy exposure†                    | IL-8#                                                       |
| Bulky disease ( $\geq 10$ cm)†                          | IL-10#                                                      |
| CD8 <sup>+</sup> T cell selection: bulk vs. CM-enriched | IL-15#                                                      |
| Corticosteroid requirement after leukapheresis†         | IL-18#                                                      |
| ECOG performance-status score                           | IL-22#                                                      |
| Extranodal disease†                                     | MCP-1#                                                      |
| International Prognostic Index score                    | MIP-1 $\beta$ #                                             |
| Karnofsky performance-status score                      | Soluble Fas#                                                |
| LDH pre-lymphodepletion elevated†                       | Soluble IL-6 receptor#                                      |
| LDH, pre-lymphodepletion (U/L)                          | TGF $\beta$ -1#                                             |
| Normal B cells in marrow (%)                            | TIM3#                                                       |
| Number of prior therapies                               | TNF- $\alpha$ #                                             |
| Platelets (cells/ $\mu$ L)*                             | TNFRp55#                                                    |
| Prior hematopoietic cell transplantation†               | TNFRp75#                                                    |
| Sex                                                     | <b>CAR-T cell kinetics</b>                                  |
| Time from leukapheresis to last intensive chemotherapy  | CAR-T cells by qPCR, peak (transgene copies/ $\mu$ g DNA)** |
| Total B cells in marrow (%)                             | CD4 <sup>+</sup> CAR-T cells, peak (cells/ $\mu$ L)**       |
| Treatment within 6 weeks before leukapheresis†          | CD8 <sup>+</sup> CAR-T cells, peak (cells/ $\mu$ L)**       |
| Treatment within 9 weeks before leukapheresis†          | <b>Toxicities</b>                                           |
| Treatment after leukapheresis†                          | Cytokine release syndrome grade                             |
| Tumor cross-sectional area‡                             | Neurotoxicity grade                                         |
| <b>Manufacturing</b>                                    |                                                             |
| CD4 <sup>+</sup> subsets, apheresis product (%)§        |                                                             |
| CD8 <sup>+</sup> subsets, apheresis product (%)§        |                                                             |
| CD4 <sup>+</sup> T cell fold expansion                  |                                                             |
| CD4 <sup>+</sup> CAR-T cell fold expansion¶             |                                                             |
| CD8 <sup>+</sup> T cell fold expansion                  |                                                             |
| CD8 <sup>+</sup> CAR-T cell fold expansion¶             |                                                             |
| CD8 <sup>+</sup> CAR-T cell subsets, infusion product§  |                                                             |

\* Screening, pre-lymphodepletion, and day 0.

† Yes versus no.

‡ Sum of the product of the perpendicular diameters of up to 6 target measurable nodes and extranodal sites.

§ Naïve, central memory (CM), effector memory, and effector memory RA.

|| T cell fold expansion from day 0 to LCL (irradiated CD19<sup>+</sup> Epstein-Barr virus lymphoblastoid cell line) stimulation.

¶ CAR-T cell fold expansion from LCL stimulation to harvest.

# Pre-lymphodepletion; day 0; delta between pre-lymphodepletion and day 0; and peak.

\*\* AUC0-28 (area under the curve from day 0 to 28) was highly correlated with peak and therefore not included in elastic net.

**Table S3. Univariate analysis for factors impacting PFS in aggressive NHL**

| Variable                                                        | HR (95% CI)       | P value* |
|-----------------------------------------------------------------|-------------------|----------|
| <b>Pre-treatment</b>                                            |                   |          |
| IPI score prior to lymphodepletion                              | 1.91 (1.30-2.79)  | .001     |
| LDH pre-lymphodepletion > ULN (Y)†                              | 3.70 (1.70-8.06)  | .001     |
| LDH, pre-lymphodepletion‡                                       | 1.24 (1.04-1.47)  | .02      |
| Abnormal B cells in blood (cells/μL)§                           | 1.07 (1.02-1.11)  | .003     |
| Abnormal B cells in marrow (%)                                  | 1.03 (1.01-1.05)  | .01      |
| Corticosteroid dose within 6 weeks before apheresis¶            | 1.88 (1.20-2.93)  | .01      |
| Corticosteroid requirement after apheresis (Y)#                 | 3.42 (1.43-8.22)  | .01      |
| Tumor cross-sectional area**                                    | 1.01 (1.00-1.02)  | .01      |
| <b>Lymphodepletion</b>                                          |                   |          |
| Low-intensity Cy/Flu (Y)#                                       | 1.92 (0.99-3.72)  | .05      |
| <b>Biomarkers</b>                                               |                   |          |
| MCP-1, fold change pre-lymphodepletion to day 0                 | 0.34 (0.14-0.86)  | .02      |
| MCP-1, delta pre-lymphodepletion to day 0††                     | 0.92 (0.85-0.99)  | .03      |
| MCP-1, day 0 (pre-CAR-T cell infusion)‡‡                        | 0.25 (0.10-0.60)  | .002     |
| MCP-1, peak‡‡                                                   | 0.31 (0.13-0.73)  | .01      |
| IL-7, pre-lymphodepletion <sup>a</sup>                          | 0.73 (0.56-0.94)  | .01      |
| IL-7, fold change pre-lymphodepletion to day 0                  | 1.26 (1.03-1.53)  | .02      |
| IL-7, peak <sup>a</sup>                                         | 0.84 (0.74-0.95)  | .01      |
| IL-7, AUC0-28                                                   | 0.26 (0.08-0.82)  | .02      |
| IL-15, day 0 (pre-CAR-T cell infusion)‡‡                        | 0.34 (0.12-1.00)  | .05      |
| IL-15, peak‡‡                                                   | 0.36 (0.13-0.99)  | .05      |
| TGFβ-1, pre-lymphodepletion‡‡                                   | 0.26 (0.10-0.68)  | .01      |
| TGFβ-1, peak‡‡                                                  | 0.26 (0.09-0.79)  | .02      |
| TGFβ-1, AUC0-28                                                 | 0.21 (0.06-0.73)  | .01      |
| IFN-γ, pre-lymphodepletion <sup>b</sup>                         | 0.43 (0.18-0.99)  | .05      |
| IFN-γ, delta pre-lymphodepletion to day 0 <sup>b</sup>          | 2.08 (1.19-3.64)  | .01      |
| IL-18, pre-lymphodepletion‡‡                                    | 3.79 (1.33-10.83) | .01      |
| IL-18, day 0 (pre-CAR-T cell infusion)‡‡                        | 3.20 (1.15-8.94)  | .03      |
| IL-18, peak‡‡                                                   | 2.27 (1.06-4.86)  | .03      |
| TNFRp75, pre-lymphodepletion‡‡                                  | 5.41 (1.51-19.33) | .01      |
| TNFRp75, peak‡‡                                                 | 5.08 (1.50-17.20) | .01      |
| IL-10, AUC0-28                                                  | 2.06 (1.09-3.88)  | .03      |
| <b>CAR-T cell kinetics</b>                                      |                   |          |
| CD8 <sup>+</sup> CAR-T cells, peak (log <sub>10</sub> cells/μL) | 0.70 (0.50-0.97)  | .03      |
| CAR-T cells by qPCR (log <sub>10</sub> transgene copies/μg DNA) | 0.69 (0.47-1.01)  | .05      |

PFS, progression-free survival; HR, Hazard Ratio; 95% CI, 95% confidence interval; IPI, International Prognostic Index; ULN, upper limit of normal; AUC0-28, area under the curve from day 0 to 28

\* Univariate Cox regression model.

† Above ULN, yes versus no.

‡ Per 100 U/L increment.

§ Per  $10^3/\mu\text{L}$  increment.

|| Per percent increment.

¶ Cumulative corticosteroid dose within 6 weeks before leukapheresis (per  $\log_{10}$  mg/m<sup>2</sup> prednisone equivalent dose increment).

# Yes versus no.

\*\* Sum of the product of the perpendicular diameters of up to 6 target measurable nodes and extranodal site per cm<sup>2</sup> increment.

†† Per 50 pg/mL serum concentration increment.

‡‡ Per  $\log_{10}$  pg/mL serum concentration increment.

<sup>a</sup> Per 5 pg/mL serum concentration increment.

<sup>b</sup> Per pg/mL serum concentration increment.

**Table S4. Multivariable model for factors impacting PFS in aggressive NHL adjusting for new treatment after CAR-T cell infusion as a time-dependent covariate\***

| <b>Variable</b>                         | <b>Hazard Ratio</b> | <b>95% CI</b> | <b>P value</b> |
|-----------------------------------------|---------------------|---------------|----------------|
| LDH, pre-lymphodepletion†               | 1.37                | 1.14-1.63     | .0007          |
| MCP-1, day 0 (pre-CAR-T cell infusion)‡ | 0.29                | 0.09-0.90     | .03            |
| IL-7, peak§                             | 0.89                | 0.77-1.04     | .14            |
| New treatment (Y)                       | 1.12                | 0.45-2.78     | .80            |

PFS, progression-free survival; HR, Hazard Ratio; 95% CI, 95% confidence interval

\* Cox regression was performed to assess the association between PFS and variables of interest where  $\log_{10}$  values were used to transform data as appropriate.

† Per 100 U/L increment.

‡ Per  $\log_{10}$  pg/mL serum concentration increment.

§ Per 5 pg/mL serum concentration increment.

|| Second CAR-T cell infusion, new antitumor therapy, or hematopoietic cell transplantation.

## SUPPLEMENTAL FIGURES

**Figure S1**

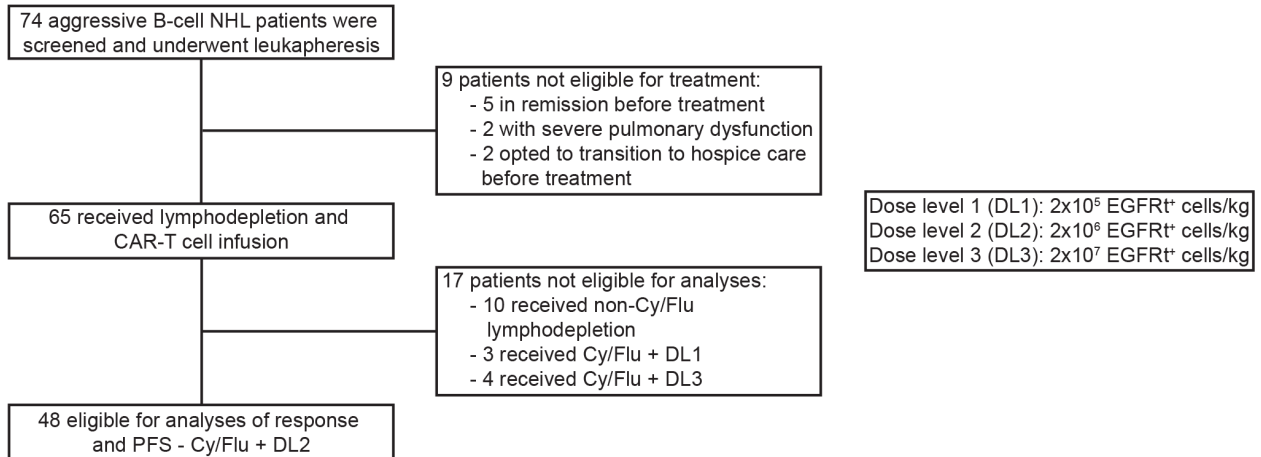

**Figure S1. Flow chart of patient enrollment and eligibility for response and progression-free survival (PFS) analyses.** NHL, non-Hodgkin lymphoma; CAR-T cell, CD19 chimeric antigen receptor-modified T cell; CR, complete remission; Cy, cyclophosphamide; Flu, fludarabine; DL, dose level.

**Figure S2**

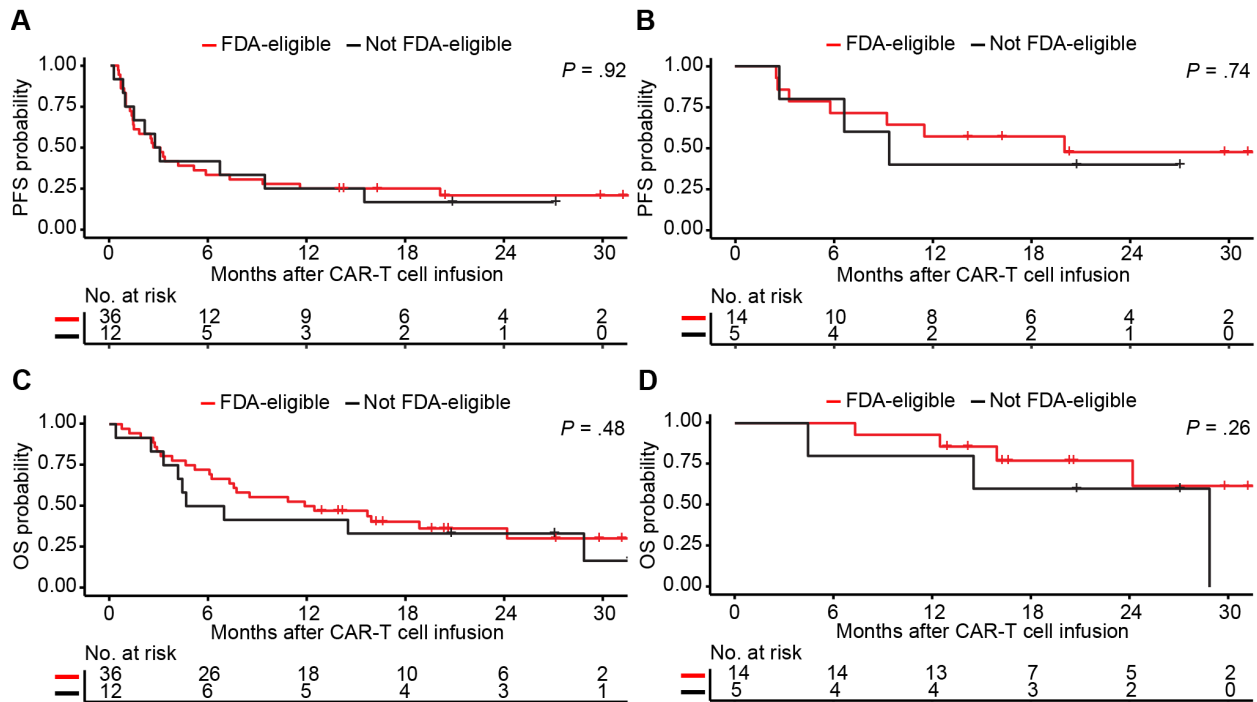

**Figure S2. Progression-free (PFS) and overall survival (OS) in aggressive NHL according to FDA-approved histologic indications for CD19 CAR-T cell immunotherapy. (A-B)** Kaplan-Meier estimates of PFS in FDA-eligible histologies (red) and histologies that are not FDA-eligible (black) in all patients **(A)** and patients who achieved CR **(B)**. **(C-D)** Kaplan-Meier estimates of OS in FDA-eligible histologies (red) and histologies that are not FDA-eligible (black) in all patients **(C)** and patients who achieved CR **(D)**. The numbers of patients at 6-month intervals are indicated. Log-rank tests were used to compare between-group differences in survival probabilities.



## Figure S3

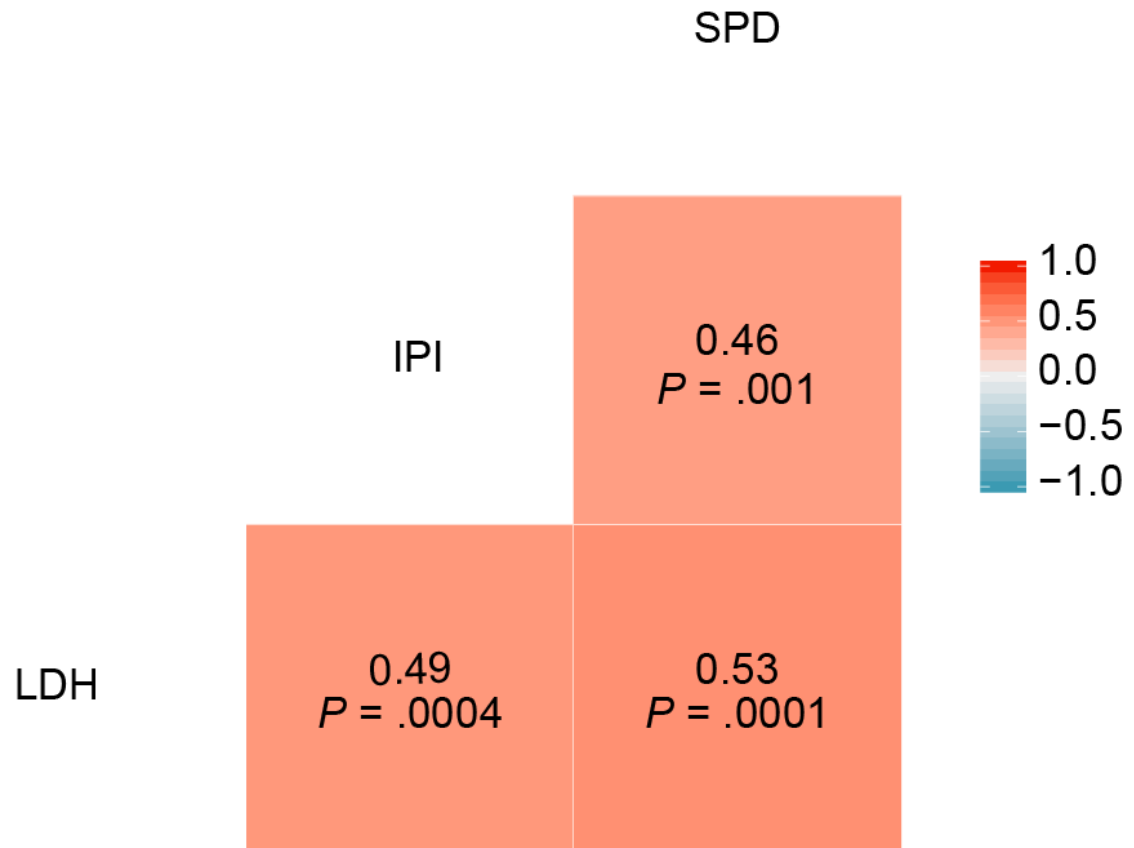

**Figure S3. LDH, IPI, and SPD are highly correlated.** Spearman correlation ( $r$  and  $P$  values) between serum lactate dehydrogenase (LDH), International Prognostic Index (IPI) score, and the sum of the product of the perpendicular diameters of up to 6 index lesions (SPD) before lymphodepletion.

**Figure S4**

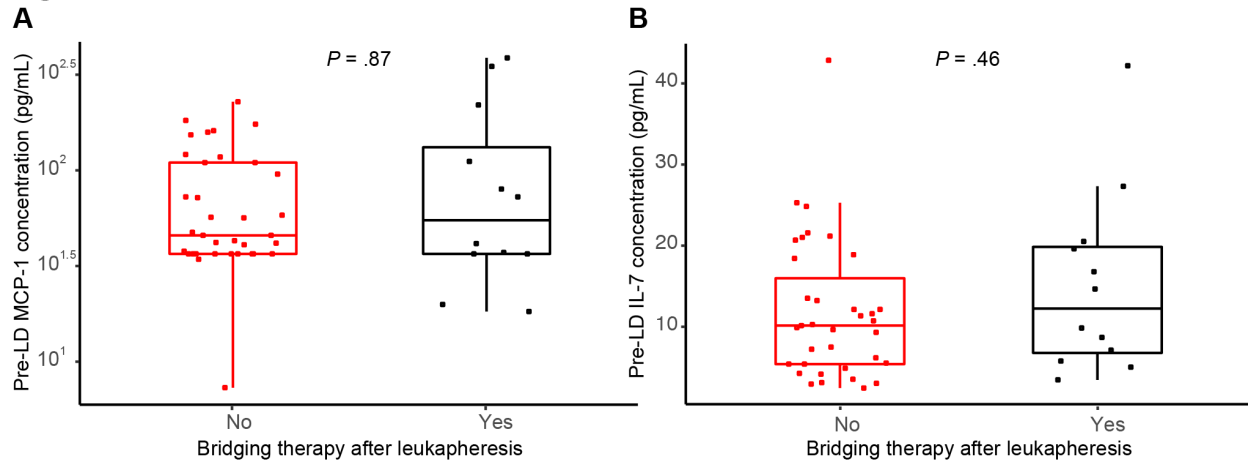

**Figure S4. Serum MCP-1 and IL-7 concentrations before lymphodepletion in aggressive NHL patients. (A-B)** Serum MCP-1 (**A**) and IL-7 (**B**) concentrations before lymphodepletion (pre-LD) in patients who did not receive bridging therapy (red) and in those who received bridging therapy (black) between leukapheresis and lymphodepletion. Each point represents data from a single patient. Box and whisker plots show the median (bar) and interquartile range (box).

**Figure S5**

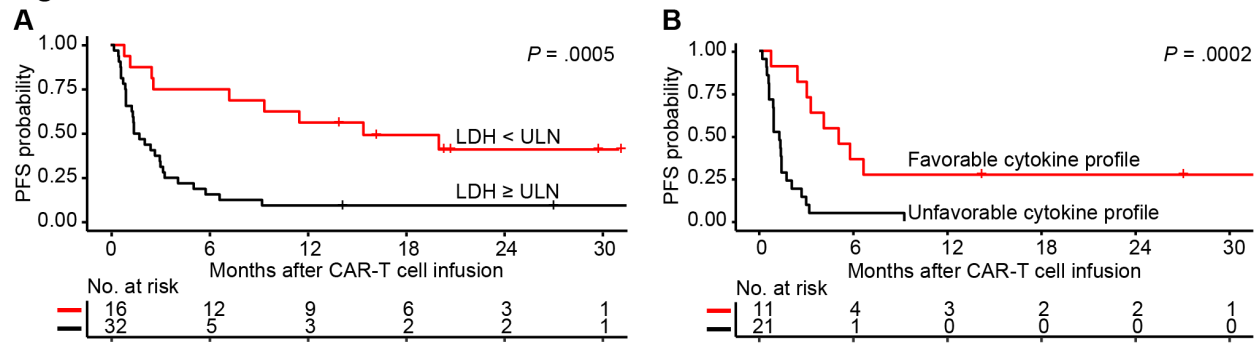

**Figure S5. Progression-free survival (PFS) in aggressive NHL according to LDH concentration and in patients with LDH above normal. (A)** Kaplan-Meier estimates of PFS in patients with pre-lymphodepletion LDH concentration below (red) or above or equal to the upper limit of normal (ULN; black). **(B)** Kaplan-Meier estimates of PFS in patients with pre-lymphodepletion LDH  $\geq$  ULN according to development of favorable cytokine profile (serum day 0 MCP-1 and peak IL-7 concentrations above the median; red) compared to unfavorable cytokine profile (serum day 0 MCP-1 and/or peak IL-7 concentrations below or equal to the median; black). The numbers of patients at 6-month intervals are indicated. Log-rank tests were used to compare between-group differences in survival probabilities.
